# Supplementary material for: Biochemical and Quality Parameter Changes of Wheat Grains during One-Year Storage under Different Storage Conditions
Source: MDPI journal article supplement (doi:10.3390/su16031155), 2024-01-30
Supplement: s1 [file s1]

**Table S1.** Germination, dry matter content, protein content, peptidase and oxidoreductase activities, advanced glycation end products content, wet gluten and falling number of wheat varieties at the beginning of storage. Results are presented as mean values  $\pm$  SD.

| Parameters                                                      | Variety | Divana            | Žitarka           | Srpanjka          |
|-----------------------------------------------------------------|---------|-------------------|-------------------|-------------------|
| Germination (%)                                                 |         | 97.00 $\pm$ 1.41  | 98.00 $\pm$ 0.82  | 95.75 $\pm$ 1.26  |
| Dry matter content (g/g)                                        |         | 0.86 $\pm$ 0.00   | 0.86 $\pm$ 0.00   | 0.86 $\pm$ 0.00   |
| Proteins A (mg/g <sub>grain dry weight</sub> )                  |         | 11.29 $\pm$ 0.33  | 9.58 $\pm$ 0.66   | 8.33 $\pm$ 0.71   |
| Proteins B (mg/g <sub>grain dry weight</sub> )                  |         | 15.43 $\pm$ 1.70  | 13.23 $\pm$ 1.03  | 12.27 $\pm$ 0.93  |
| Arginyl-aminopeptidase (mU/g <sub>grain dry weight</sub> )      |         | 25.57 $\pm$ 2.80  | 21.33 $\pm$ 1.18  | 16.78 $\pm$ 1.48  |
| Phenylalanyl-aminopeptidase (mU/g <sub>grain dry weight</sub> ) |         | 36.28 $\pm$ 1.54  | 30.55 $\pm$ 2.21  | 25.38 $\pm$ 1.52  |
| Carboxypeptidase (mU/g <sub>grain dry weight</sub> )            |         | 20.78 $\pm$ 0.73  | 25.70 $\pm$ 3.55  | 30.99 $\pm$ 1.27  |
| Aspartic proteinase (U/g <sub>grain dry weight</sub> )          |         | 0.42 $\pm$ 0.03   | 0.47 $\pm$ 0.03   | 0.41 $\pm$ 0.02   |
| Catalase (U/g <sub>grain dry weight</sub> )                     |         | 7.61 $\pm$ 0.38   | 8.66 $\pm$ 0.26   | 7.73 $\pm$ 0.46   |
| Glutathione reductase (mU/g <sub>grain dry weight</sub> )       |         | 76.04 $\pm$ 2.08  | 76.87 $\pm$ 2.79  | 65.25 $\pm$ 3.95  |
| Guaiacol peroxidase (U/g <sub>grain dry weight</sub> )          |         | 2.82 $\pm$ 0.11   | 2.70 $\pm$ 0.06   | 2.02 $\pm$ 0.08   |
| Polyphenol oxidase (mU/g <sub>grain dry weight</sub> )          |         | 66.95 $\pm$ 2.74  | 36.46 $\pm$ 4.47  | 11.57 $\pm$ 1.06  |
| Advanced glycation end products/Fast index (%)                  |         | 0.61 $\pm$ 0.01   | 1.19 $\pm$ 0.02   | 1.03 $\pm$ 0.15   |
| Wet gluten content (%)                                          |         | 34.70 $\pm$ 0.10  | 32.43 $\pm$ 0.06  | 23.97 $\pm$ 0.60  |
| Falling number (s)                                              |         | 282.80 $\pm$ 5.89 | 341.40 $\pm$ 8.47 | 322.00 $\pm$ 7.62 |
